# Supplementary material
Source: PubMed Central journal article supplement (PMC8568004)

**Cluster 1 distance to LH clusters**  
**P = 0.1027**

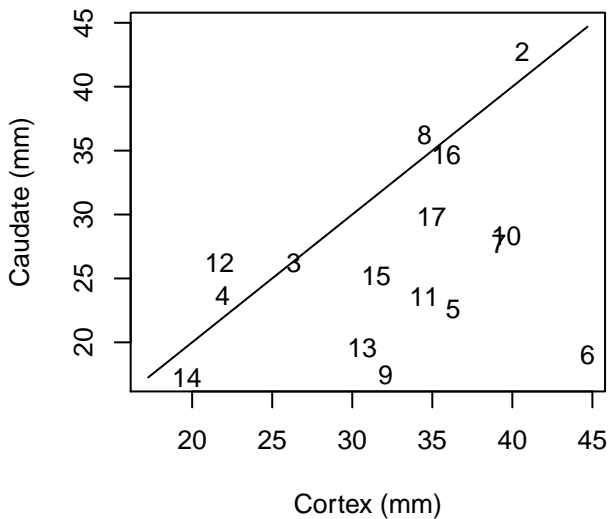

**Cluster 1 distance to RH clusters**  
**P = 0.06713**

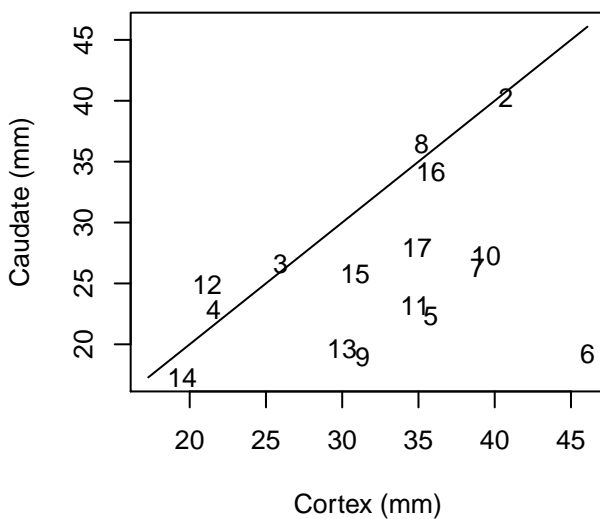

**Cluster 2 distance to LH clusters**  
**P = 1**

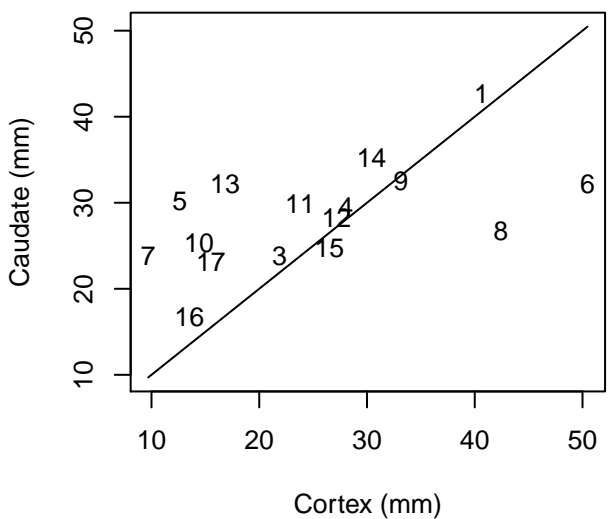

**Cluster 2 distance to RH clusters**  
**P = 1**

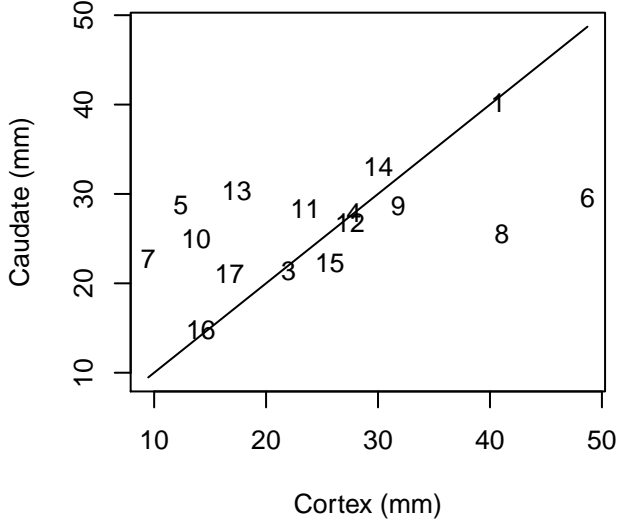

**Cluster 3 distance to LH clusters**

**P = 1**

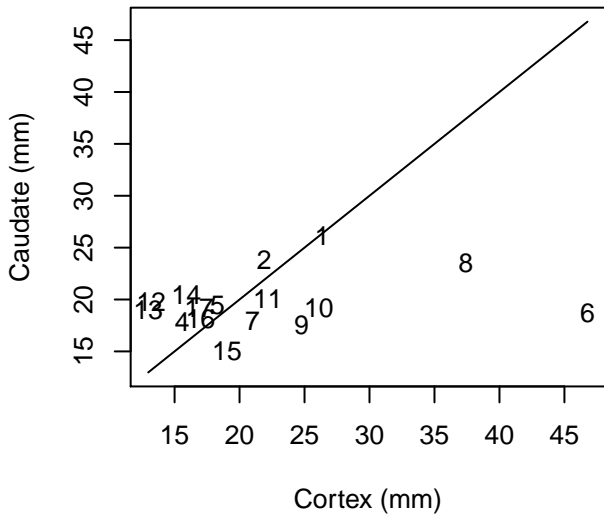

**Cluster 3 distance to RH clusters**

**P = 1**

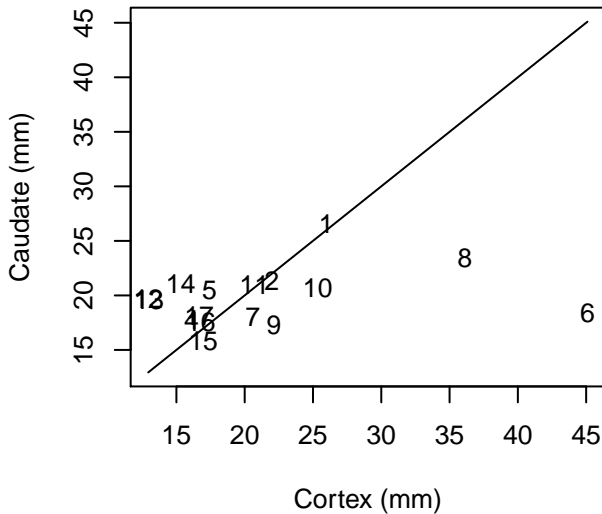

**Cluster 4 distance to LH clusters**

**P = 0.5582**

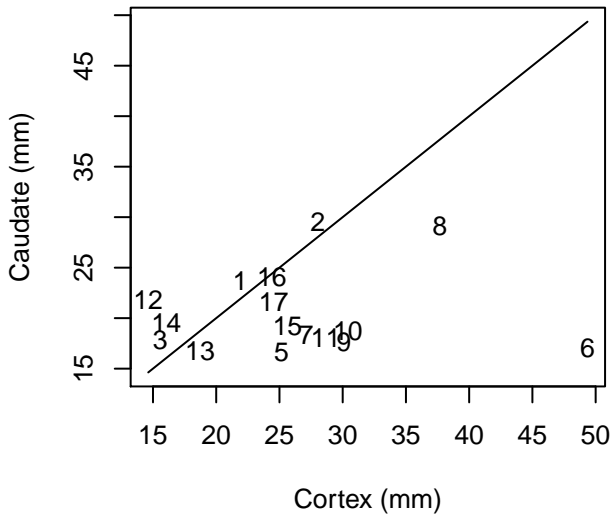

**Cluster 4 distance to RH clusters**

**P = 0.3859**

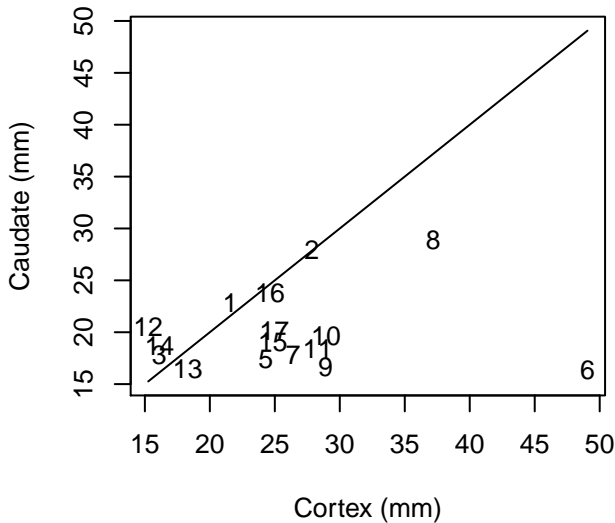

**Cluster 5 distance to LH clusters**  
**P = 1**

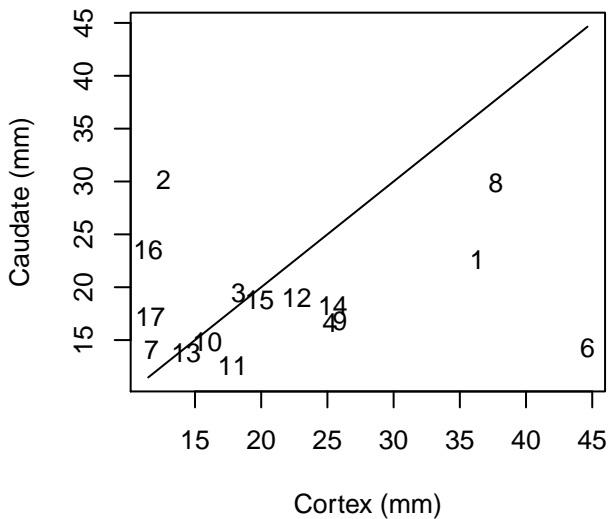

**Cluster 5 distance to RH clusters**  
**P = 1**

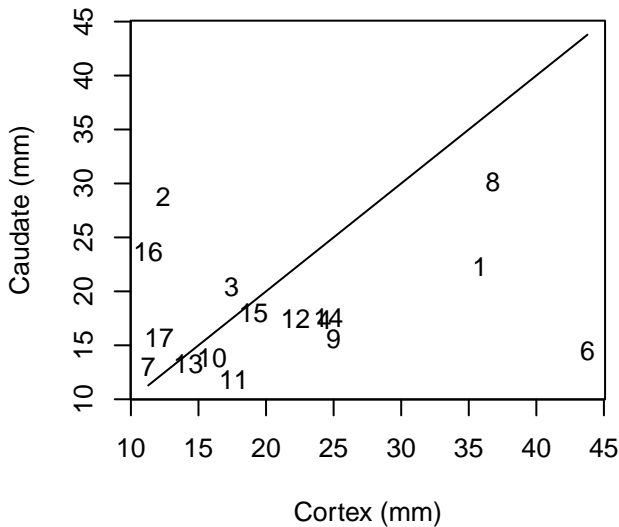

**Cluster 6 distance to LH clusters**  
**P = 1.174e-06**

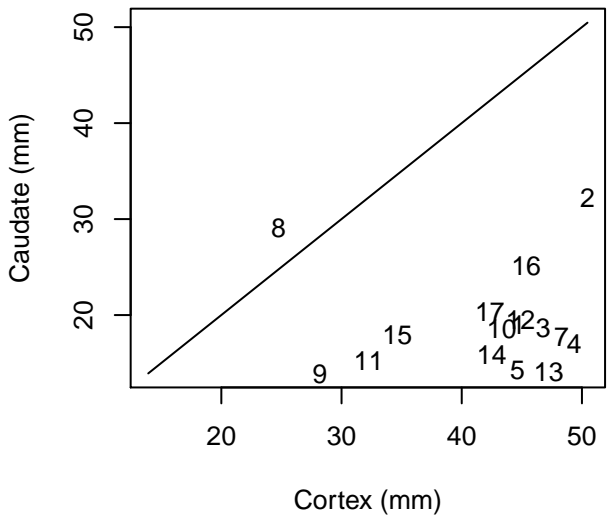

**Cluster 6 distance to RH clusters**  
**P = 1.115e-06**

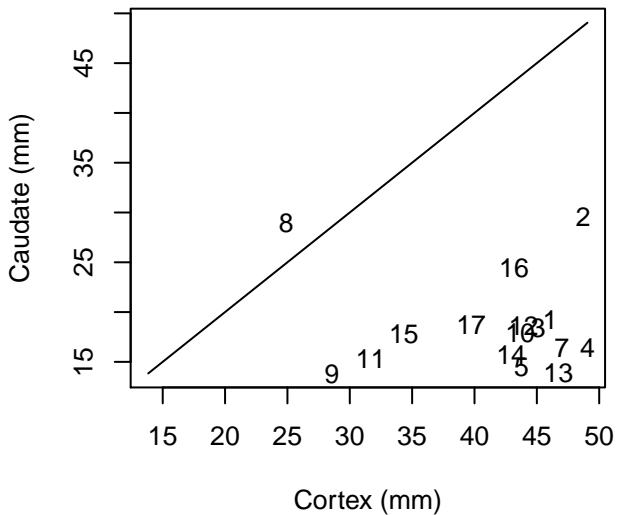

**Cluster 7 distance to LH clusters**  
**P = 0.7306**

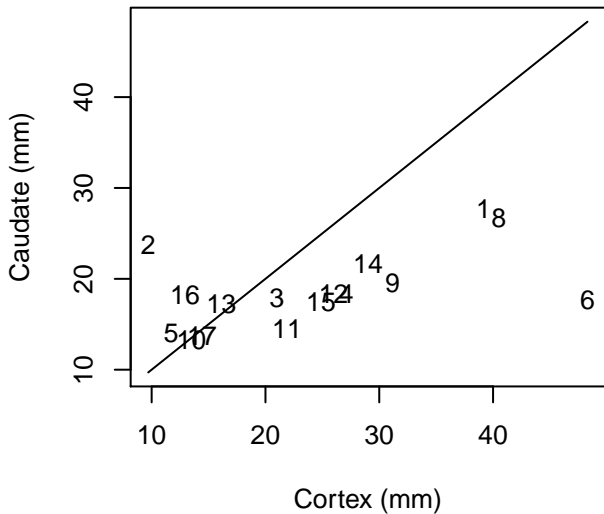

**Cluster 7 distance to RH clusters**  
**P = 0.4262**

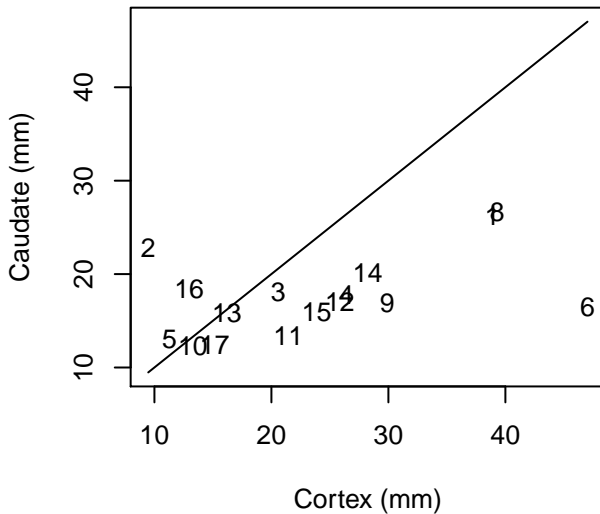

**Cluster 8 distance to LH clusters**  
**P = 0.004276**

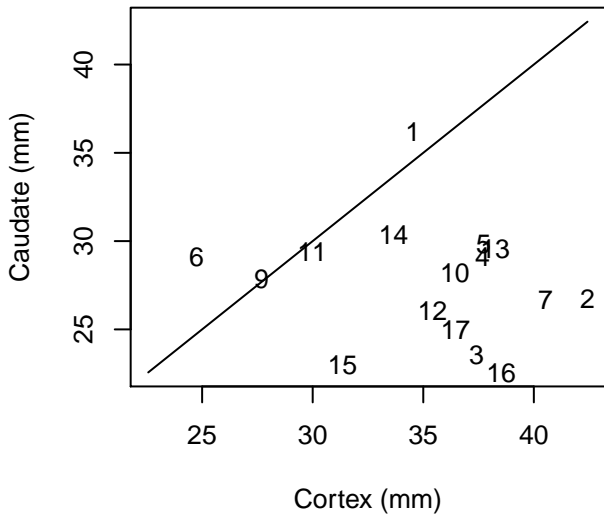

**Cluster 8 distance to RH clusters**  
**P = 0.005127**

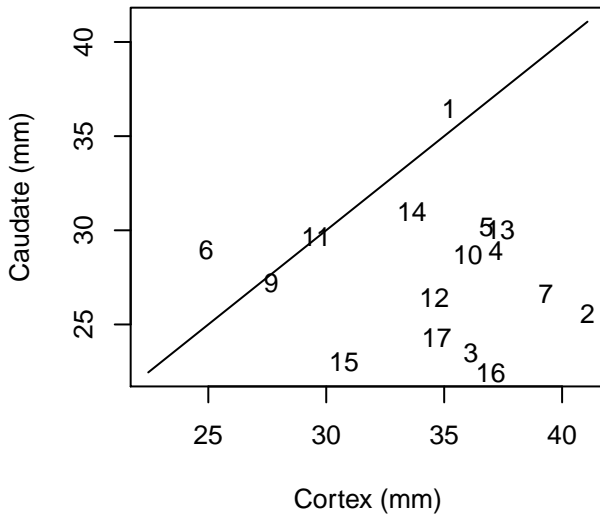

**Cluster 9 distance to LH clusters**  
**P = 0.01577**

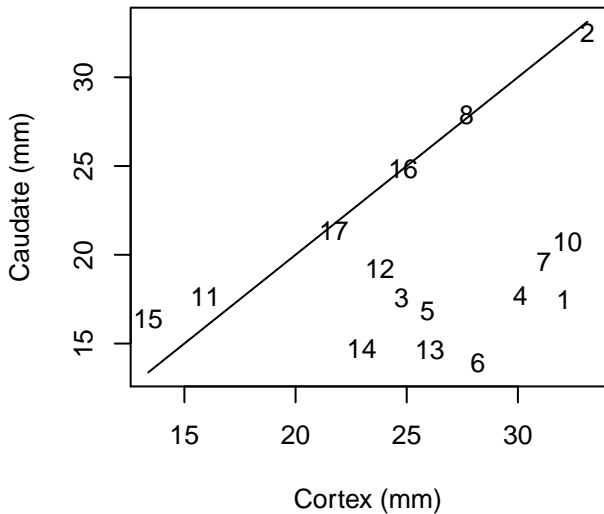

**Cluster 9 distance to RH clusters**  
**P = 0.008042**

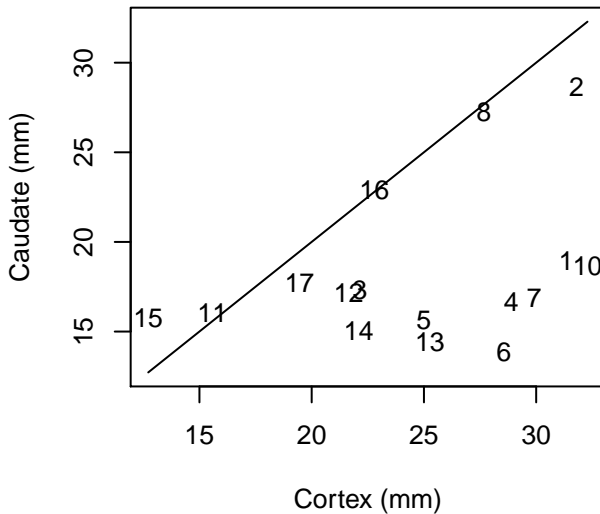

**Cluster 10 distance to LH clusters**  
**P = 0.06133**

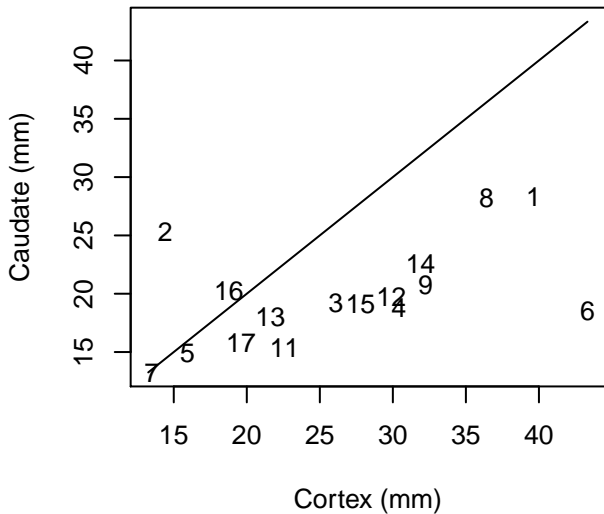

**Cluster 10 distance to RH clusters**  
**P = 0.04894**

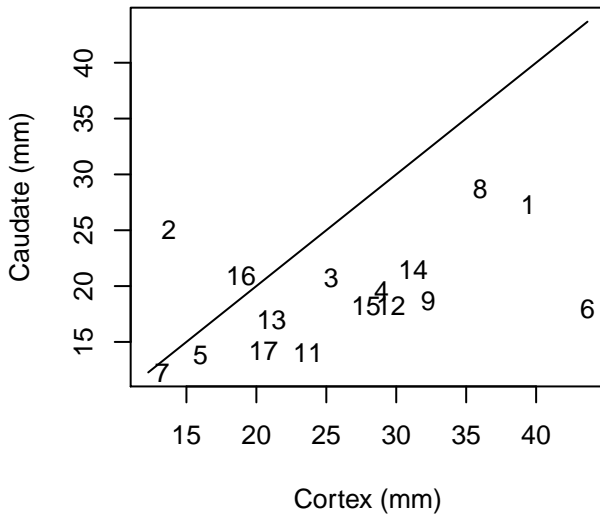

**Cluster 11 distance to LH clusters**  
**P = 0.6681**

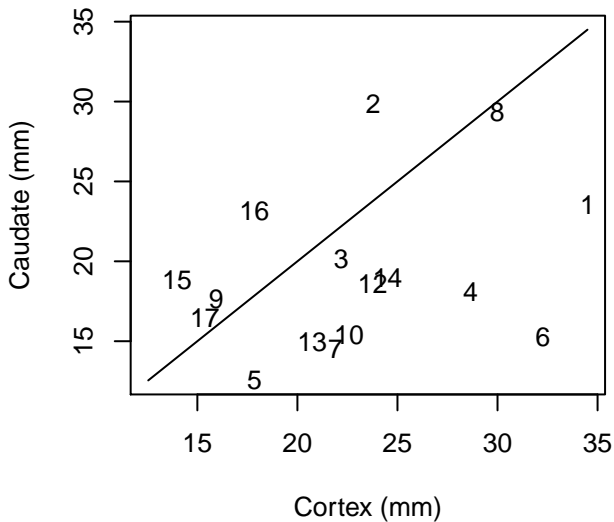

**Cluster 11 distance to RH clusters**  
**P = 0.5858**

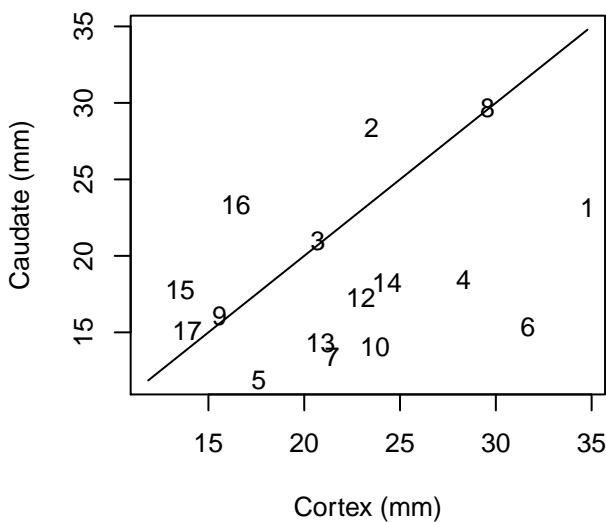

**Cluster 12 distance to LH clusters**  
**P = 1**

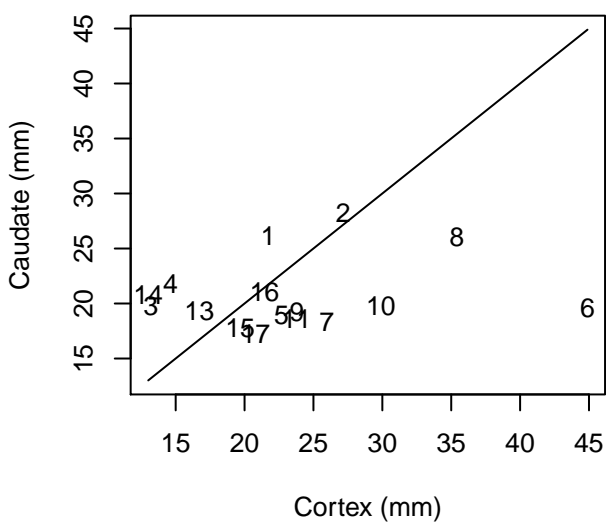

**Cluster 12 distance to RH clusters**  
**P = 1**

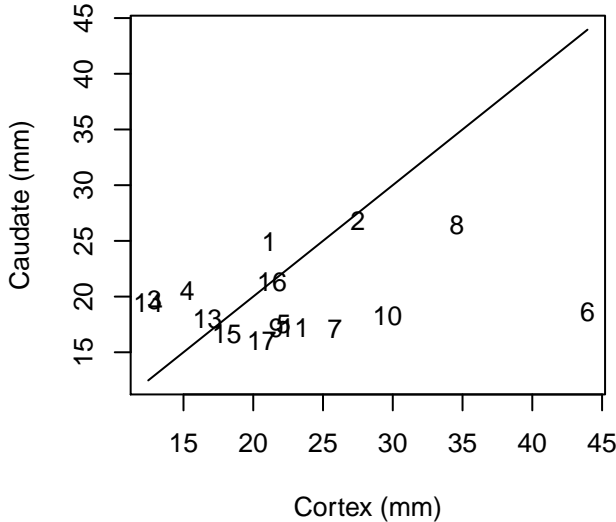

**Cluster 13 distance to LH clusters**  
**P = 1**

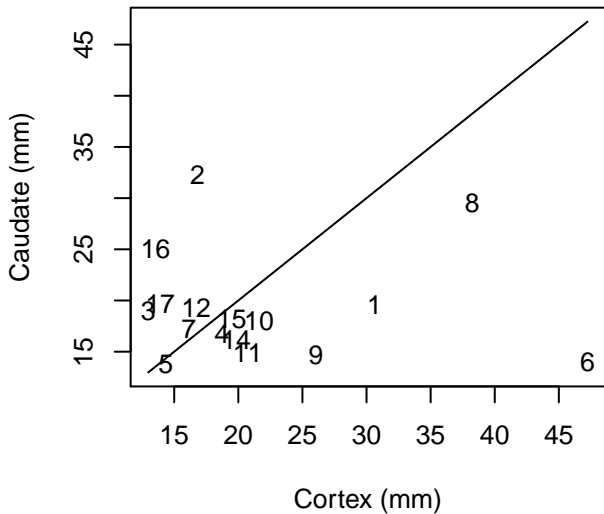

**Cluster 13 distance to RH clusters**  
**P = 1**

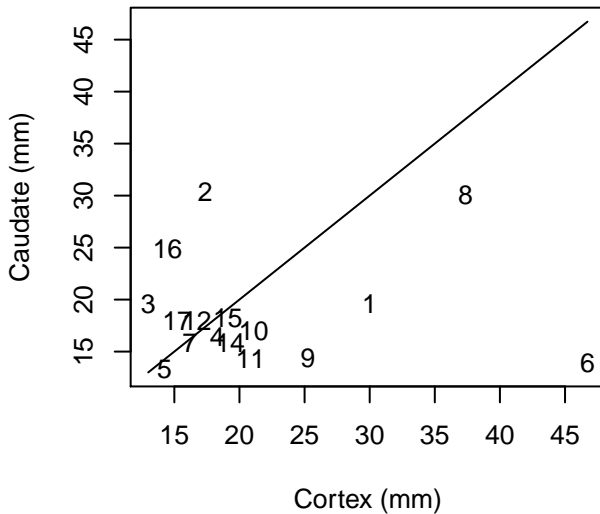

**Cluster 14 distance to LH clusters**  
**P = 1**

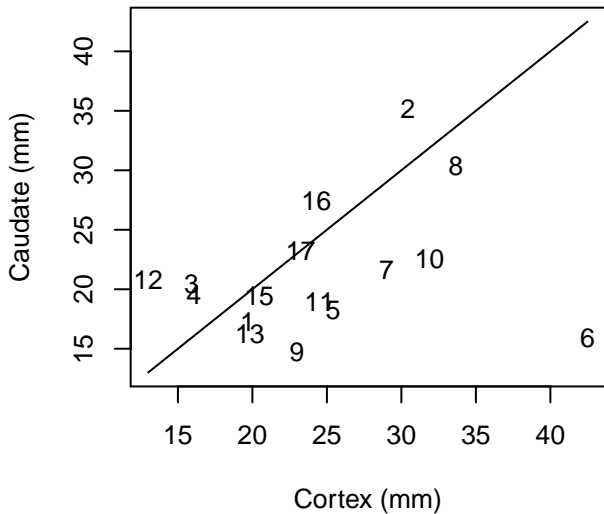

**Cluster 14 distance to RH clusters**  
**P = 1**

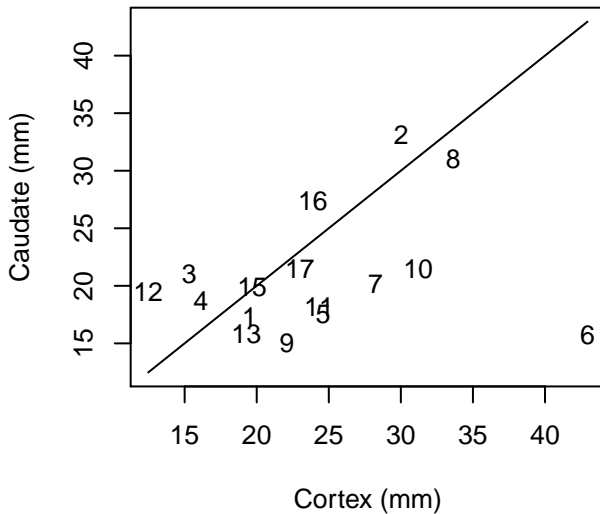

**Cluster 15 distance to LH clusters**  
**P = 0.3162**

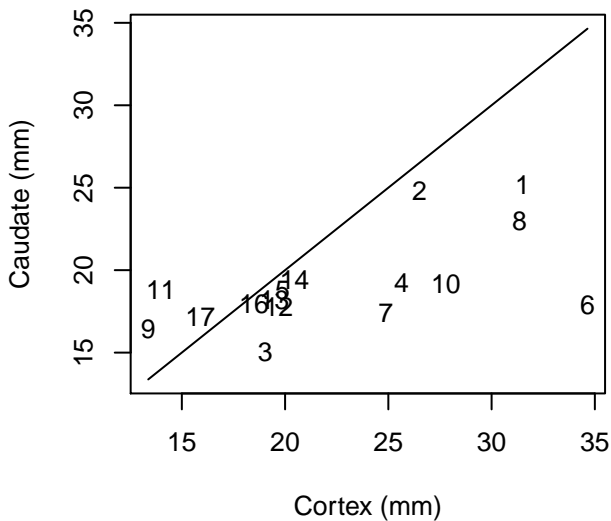

**Cluster 15 distance to RH clusters**  
**P = 0.4109**

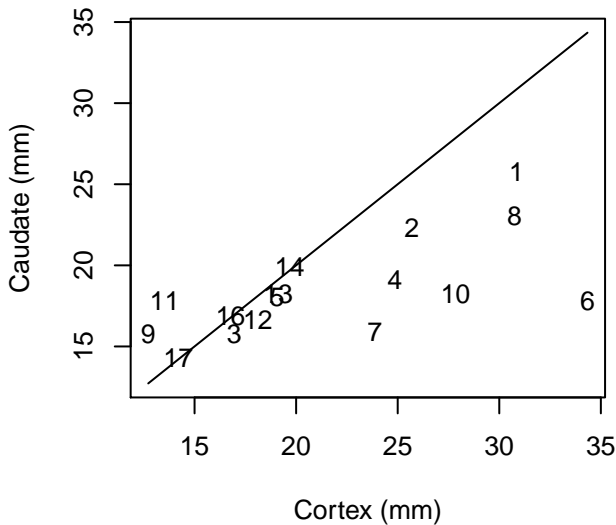

**Cluster 16 distance to LH clusters**  
**P = 1**

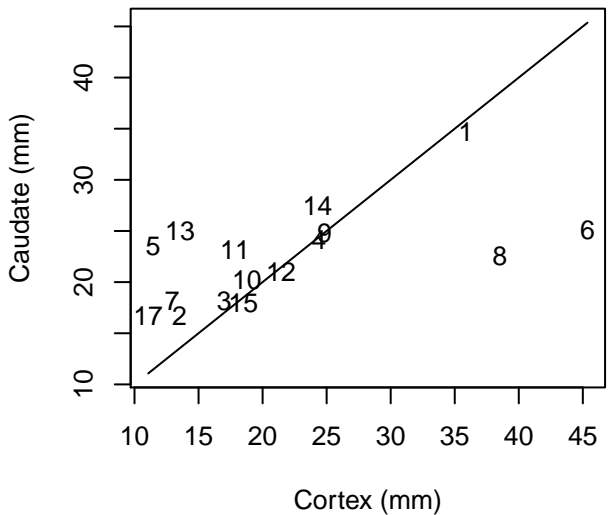

**Cluster 16 distance to RH clusters**  
**P = 1**

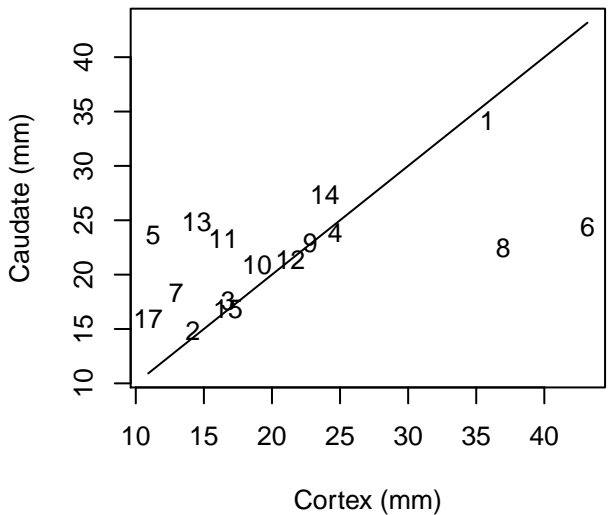



**Cluster 17 distance to LH clusters**  
**P = 1**

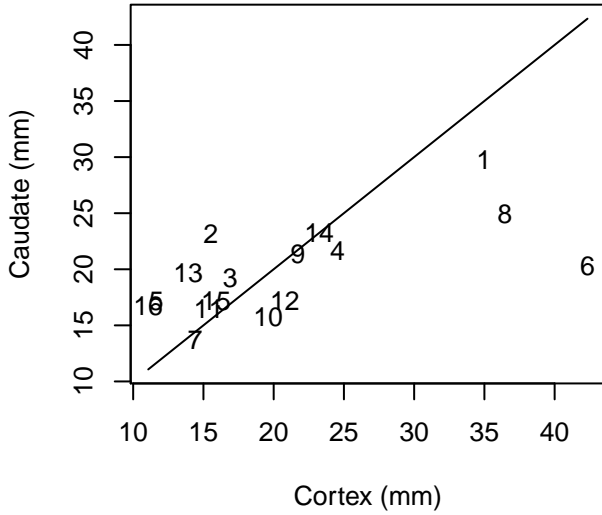

**Cluster 17 distance to RH clusters**  
**P = 1**

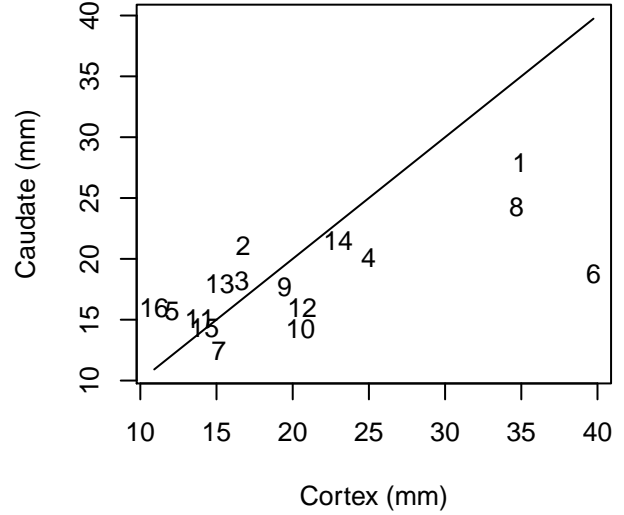

Supplement: supplementary_fig_1_bhab159.pdf [file supplementary_fig_1_bhab159.pdf]
